# Supplementary material for: Identification of TCP13 as an Upstream Regulator of ATHB12 during Leaf Development
Source: MDPI journal article supplement (doi:10.3390/genes10090644), 2019-08-26
Supplement: s1 [file s1]

## Supplementary Materials:

**Table S1.** Primers used in this study.

### Gene Cloning

| Name                         | Forward                                              | Reverse                                              |
|------------------------------|------------------------------------------------------|------------------------------------------------------|
| <i>P<sub>TCP13</sub>-GUS</i> | GGG AAG CTT AAC CTA CGA AAT<br>TTT CTT AAC GTA AAT T | CCC TCT AGA AAT GCT ATT CTC<br>GAG ATC TTT ATA TCT A |
| <i>pATHB12::HIS3</i>         | GGG GAA TTC TTT ATT TTT CTT<br>GGG CAA TGA AT        | CTC TCT AGA GGT TTT CAC CAG<br>ATC TTG TAA GTT       |
| <i>pATHB12::LacZ</i>         | GGG GAA TTC TTT ATT TTT CTT<br>GGG CAA TGA AT        | CTT CCT CGA GGG TTT TCA CCA<br>GAT CTT GTA AGT TTC   |

### qRT-PCR

| Name   | Forward                               | Reverse                               |
|--------|---------------------------------------|---------------------------------------|
| TCP13  | TTC CC AAA ACA TTT CGA CAT            | TAC AAC GCT CCG AGC CTA GA            |
| ATHB12 | GGT TAG ACC AAG GGA GTG TTC<br>TAT GT | CAA TTC TCA GAA GAT GTC AAG<br>CAA CT |
| UBQ5   | CGG ACC AGC AGC GAT TG                | GGG TAC GGC CGT CTT CAA G             |
| PP2A   | TAA CGT GGC CAA AAT GAT GC            | GTT CTC CAC AAC CGC TTG GT            |

### ChIP-qPCR

| Name        | Forward                            | Reverse                            |
|-------------|------------------------------------|------------------------------------|
| pATHB12-(A) | ACT AAT GAA AAG TCT CGT TAA<br>AAC | ATC AGG ATG TTT GAC GGG TGT<br>TAA |
| pATHB12-(B) | ATG TGA ACG TGG AAT CTC GTT<br>ACA | ATC ATC ATT TAA CAT GTG ACT<br>GCC |
| pATHB12-(C) | ATA CGT TGT TGC ATG TTA AAA<br>CAT | GTT CCT AAG AAA AAT GAA GCA<br>GTT |
| pATHB12-(D) | AAA AGT ATG AAA ATA TTA TCA<br>GTA | GAC CTG CAA ATA TTG TGG AAC<br>CAC |
| pATHB12-(E) | TTT TTA TTC AAT GAG TTT ATT<br>TTG | TTC TGG AAT CTC TGA GTT GCT<br>GAT |
| PP2A        | CTG GCG TGT GCG TTA TAT G          | CAA ACA TGG ACT TCC AAG TAC<br>C   |

**Table S2.** List of putative upstream regulators of *ATHB12* isolated by yeast one-hybrid screening.

| Locus     | Gene name                                                                                                   |
|-----------|-------------------------------------------------------------------------------------------------------------|
| AT3G61120 | AGAMOUS-like 13(AGL13)                                                                                      |
| AT2G46870 | AP2/B3-like transcriptional factor family protein(NGA1)                                                     |
| AT2G45850 | AT hook motif DNA-binding family protein(AT2G45850)                                                         |
| AT2G16400 | BEL1-like homeodomain 7(BLH7)                                                                               |
| AT3G02380 | CONSTANS-like 2(COL2)                                                                                       |
| AT1G02210 | NAC domain transcriptional regulator superfamily protein(AT1G02210)                                         |
| AT5G18300 | NAC domain containing protein 88(NAC088)                                                                    |
| AT5G07500 | Zinc finger C-x8-C-x5-C-x3-H type family protein(PEI1)                                                      |
| AT1G35240 | auxin response factor 20(ARF20)                                                                             |
| AT2G22760 | basic helix-loop-helix (bHLH) DNA-binding superfamily protein(AT2G22760)                                    |
| AT5G03790 | homeobox 51(HB51)                                                                                           |
| AT3G02150 | plastid transcription factor 1(PTF1)/ TEOSINTE BRANCHED1, CYCLOIDEA AND PCF TRANSCRIPTION FACTOR 13 (TCP13) |

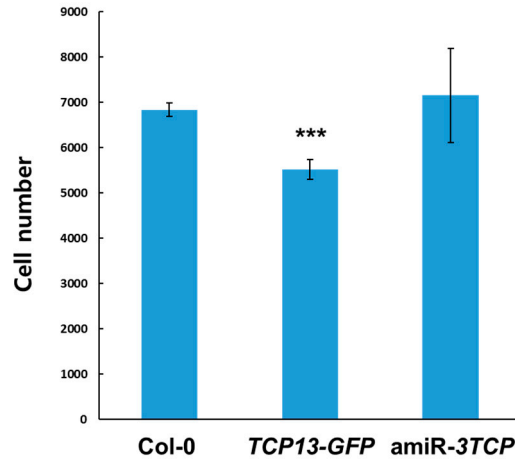

**Figure S1.** Effect of TCP13 on leaf cell number in *Arabidopsis*. Cell number of the L1 of 14-day-old wild-type, *TCP13-GFP* and *amiR-3TCP* seedlings. Significant differences as evaluated by one-way ANOVA: \*\*\*,  $P < 0.005$ , \*\*,  $P < 0.01$  and \*,  $P < 0.05$ . Data shown are means  $\pm$  SD ( $n = 5$ ).

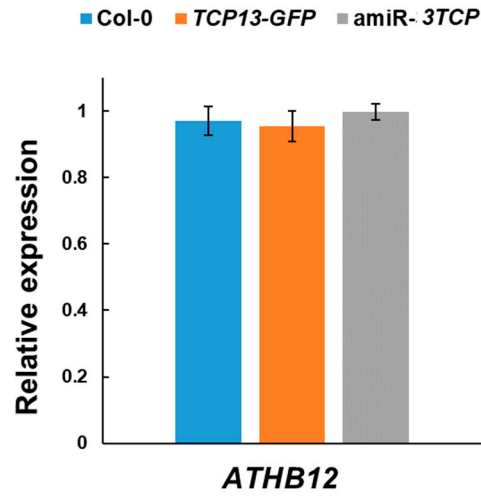

**Figure S2.** *ATHB12* expression in whole seedlings of wild-type, *TCP13-GFP* and *amiR-3TCP* plants. Expression of *ATHB12* in the wild-type, *TCP13-GFP* and *amiR-3TCP* seedlings was examined by real-time quantitative PCR using the whole seedlings. Results are representative of more than three independent experiments. Data shown are means  $\pm$  SD ( $n = 2$ ).

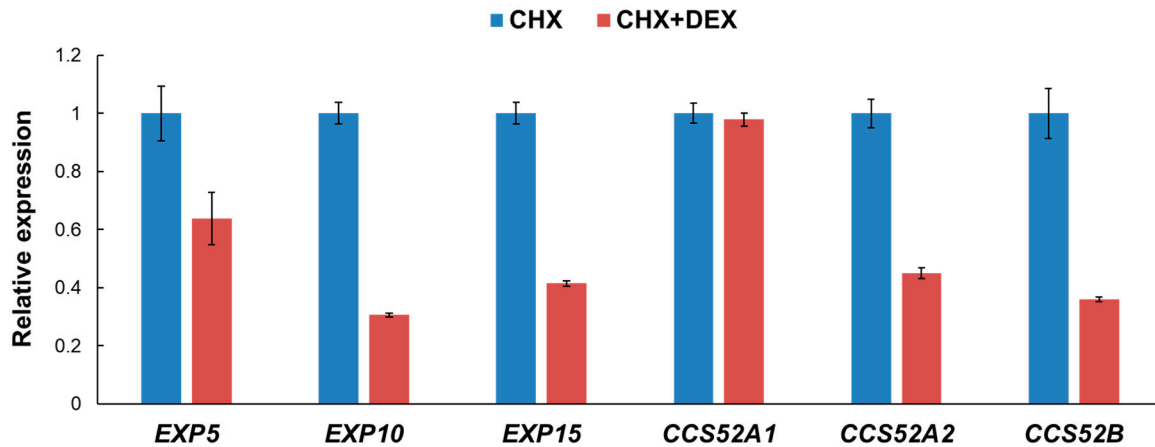

**Figure S3.** Expression of downstream genes of *ATHB12* after *TCP13* induction. Effect of *TCP13* induction on the expression of *ATHB12* and *EXPANSINs* (*EXPAs*) was examined by real-time quantitative PCR. Total RNAs was isolated from *TCP13-GR* seedlings with or without 10  $\mu$ M dexamethasone (DEX) in the presence of 10  $\mu$ M cycloheximide for 2 h. Results are representative of more than three independent experiments. Data shown are means  $\pm$  SD ( $n = 2$ ).

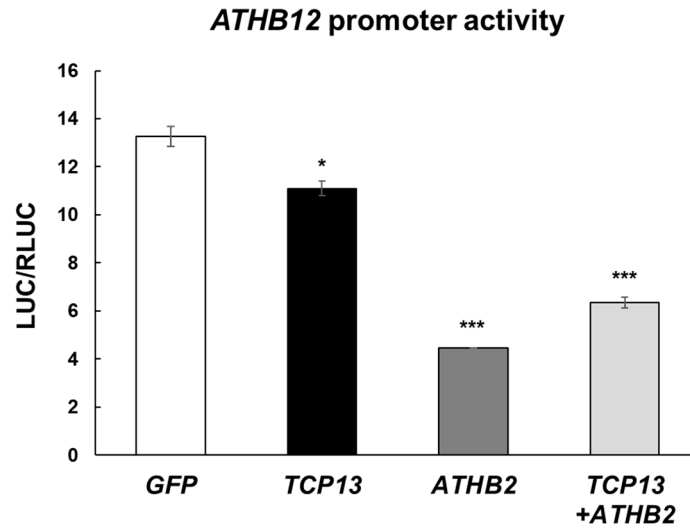

**Figure S4.** Effect of TCP13 and ATHB2 on the expression of *ATHB12* examined by luciferase assay. Luciferase assays using a 2.2-kb region of *ATHB12* promoter. *Arabidopsis* protoplasts were transiently transfected with reporter genes, *P<sub>ATHB12</sub>::LUC* and *P<sub>35S</sub>::RLUC*, together with several effectors such as *P<sub>35S</sub>::GFP* or *P<sub>35S</sub>::TCP13-GFP* or *P<sub>35S</sub>::ATHB2-GFP* constructs. Firefly luciferase (LUC) activity was normalized with *Renilla* luciferase (RLUC) activity. Data shown are means  $\pm$  SD ( $n = 2$ ). Significant differences as evaluated by one-way ANOVA: \*\*\*,  $P < 0.005$ , \*\*,  $P < 0.01$  and \*,  $P < 0.05$ .

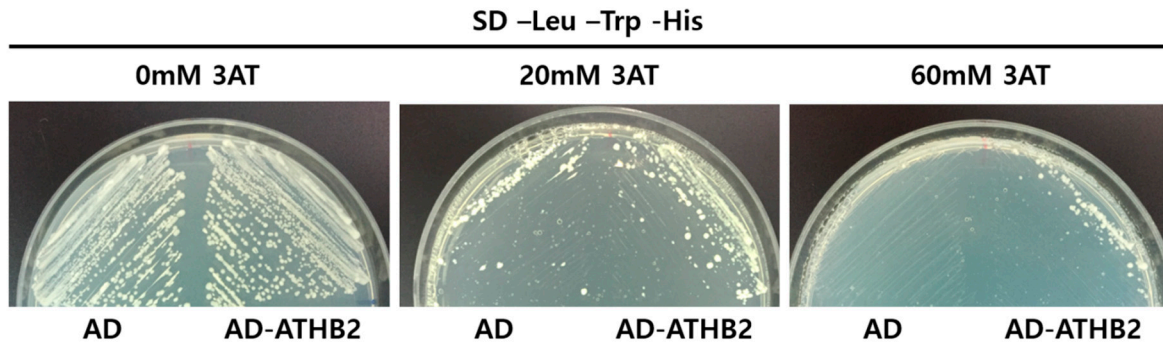

**Figure S5.** Binding of ATHB2 to the *ATHB12* promoter examined by yeast one-hybrid assay. Full-length cDNA of *ATHB2* was in-frame fused to GAL4 AD domain of pGAD424 and the resulting vector (AD-ATHB2) or the empty vector (AD) was introduced into *S. cerevisiae* strain AH109 (*MATa*, *trp1-901*, *leu2-3, 112*, *ura3-52*, *his3-200*, *gal4Δ*, *gal80Δ*, *LYS2::GAL1<sub>UAS</sub>-GAL1<sub>TATA</sub>-HIS3*, *MEL1*, *GAL2<sub>UAS</sub>-GAL2<sub>TATA</sub>-ADE2*, *URA3::MEL1<sub>UAS</sub>-MEL1<sub>TATA</sub>-lacZ*) containing *P<sub>ATHB12</sub>::His* construct. Transformants were grown on SD/-Leu/-His/-Trp agar medium in the presence of 20 mM (middle) or 60 mM (right) 3-AT for 2 ~ 3 days at 30°C.
